# Supplementary material for: Insight into biases and sequencing errors for amplicon sequencing with the Illumina MiSeq platform
Source: PubMed Central journal article supplement (PMC4381044; doi:10.1093/nar/gku1341), 2015-01-13
Supplement: supp_gku1341_nar-01235-met-n-2014-File003.pdf [file supp_gku1341_nar-01235-met-n-2014-File003.pdf]

## Supplementary Material

### Comparing Different Library Preparation Methods

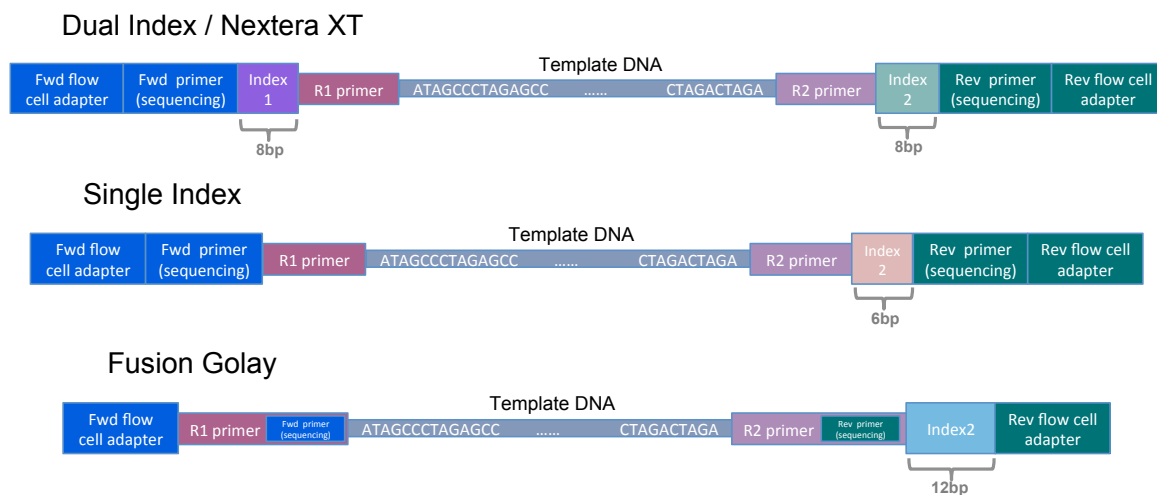

Figure S1: Overview of the different amplicon design methods.

#### Fusion Golay Primer Design:

1-10 ng of balanced or unbalanced synthetic community is subjected to an amplification step using 0.3  $\mu\text{M}$  primer forward fusion; 0.3  $\mu\text{M}$  primer reverse fusion specific; 1x HiFi or Q5 polymerase ready mix. The PCR for each variable region was carried out in triplicate in a 25  $\mu\text{l}$  reaction in a Thermal Cycler (Applied Biosystem GeneAmp PCR system 9700) with the following parameters: initial denaturation at 94°C for 5 min, followed by 25 cycles of 98°C for 20 s, 60°C for 15 s, and 72°C for 40 s with a final extension at 72°C for 1 min.

#### Nextera:

1 ng of balanced or unbalanced synthetic community DNA is submitted to the following amplification reaction: 0.3  $\mu\text{M}$  forward primer (27YMF); 0.3  $\mu\text{M}$  reverse primer (1492R); 1x HiFi polymerase ready mix. The PCR was carried out in triplicate in a 25  $\mu\text{l}$  reaction in a Thermal Cycler (Applied Biosystem GeneAmp PCR system 9700) with the following parameters: initial denaturation at 94°C for 5 min, followed by 25 cycles of 98°C for 20 s, 60°C for 15 s, and 72°C for 40 s with a final extension at 72°C for 1 min. The amplicon libraries were cleaned to remove excess nucleotides, salts and enzymes using 20  $\mu\text{l}$  of the Agencourt AMPure XP system (Beckman Coulter Genomics) and eluted in TE buffer. 50 ng of amplicon library was submitted to a Nextera DNA library preparation following the Nextera <sup>®</sup> DNA Sample Preparation Guide recommendation.

Universal Tailed Tag design: (Single or dual index barcoding strategy)

1-10 ng of balanced or unbalanced synthetic community DNA was used in the first amplification step using the following reaction: 0.1  $\mu$ M forward primer (F515A, 515, 341f); 0.1  $\mu$ M reverse tailed primer (806rcb, 805R); 1x HiFi or Q5 polymerase ready mix. The PCR was carried out in triplicate in a 25  $\mu$ l reaction in a Thermal Cycler (Applied Biosystem GeneAmp PCR system 9700) with the following parameters: initial denaturation at 94°C for 5 min, followed by 10 cycles of 98°C for 20 s, 60°C for 15 s, and 72°C for 40 s with a final extension at 72°C for 1 min. The amplicon libraries were cleaned to remove excess nucleotides, salts and enzymes using 20  $\mu$ l of the Agencourt AMPure XP system (Beckman Coulter Genomics) and eluted in 10  $\mu$ l of TE buffer. The 10  $\mu$ l of the first step reaction was submitted to a second amplification step using the following condition: 0.1  $\mu$ M forward barcoded primer (DI\_MIDFor) for the dual index strategy or a forward not barcoded primer for the single index strategy; 0.1  $\mu$ M primer barcoded reverse primer (DI\_MIDRev); using same cycling condition as above.

Table S1: PCR primers used in this study: The variable region primer sequence is underlined and in bold. The position of the multiplex identifier (MID) is shown as [x] . Standard and Nextera MID sequences were used for single and dual index libraries while for Fusion Golay a 12 bp corrected MID was used as shown in Table S2. Degenerated bases in the sequence represent the following nucleotides: M: C or A; B: not A; Y: C or T; R: A or G; W: A or T; H: not G; K: G or T; V: not T.

| Primer name            | Library design | Variabel region | Sequence                                                                                                                       |
|------------------------|----------------|-----------------|--------------------------------------------------------------------------------------------------------------------------------|
| 27YMF<br>1492R         | NEXTERA        | V1-V9           | AGAGTTTGATYMTGGCTCAG<br>TACGGYTACCTTGTAYGACTT                                                                                  |
| F515A<br>805R          | DI             | V4              | CTACACTCTTTCCCTACACGACGCTCTTCCGATCTGTGBCAGCMGCCGGGTAA<br>GTGACTGGAGTTCAGACGTGTGCTCTTCCGATCTGACTACHVGGGTATCTAATCC               |
| DI_MIDFor<br>DI_MIDRev | DI             | V4              | AATGATACGGGACCCAGGAGATCTACACxxxxxxxACACTCTTTCCCTACACGACG<br>CAAGCAGAAGACGGCATACGAGATxxxxxxxGTGACTGGAGTTTCAGACGTGTGCTCTTCCGATCT |
| 314F<br>806rbcx        | DI             | V3-V4           | CTACACTCTTTCCCTACACGACGCTCTTCCGATCTCCTAYGGGRBGCASCAG<br>CAAGCAGAAGACGGCATACGAGATxxxxxxxAGTCAGTCAGCCGGACTACHVGGGTWATA           |
| 515<br>806rbcx         | FG             | V4              | AATGATACGGGACCCAGGAGATCTACACTATGGTAATGTGTGCCAGCMGCCGGGTAA<br>CAAGCAGAAGACGGCATACGAGATxxxxxxxAGTCAGTCAGCCGGACTACHVGGGTWATA      |

Table S2: An error corrected multiplex identifier sequence used with MiSeq sequencing technology. A 12bp reverse Index used for unidirectional tagging in the Fusion Primer approach (F).

| Primer name | Library design | Sequence       |
|-------------|----------------|----------------|
| 806rcbc0    | FG             | TCCCTTGTCTCC   |
| 806rcbc1    | FG             | ACGAGACTGATT   |
| 806rcbc2    | FG             | GCTGTACGGATT   |
| 806rcbc3    | FG             | ATCACCAGGTGT   |
| 806rcbc4    | FG             | TGGTCAACGATA   |
| 806rcbc5    | FG             | ATCGCACAGTAA   |
| 806rcbc6    | FG             | GTCGTGTAGCCT   |
| 806rcbc7    | FG             | AGCGGAGGTTAG   |
| 806rcbc8    | FG             | ATCCTTTGGTTC   |
| 806rcbc9    | FG             | TACAGCGCATAAC  |
| 806rcbc10   | FG             | ACCGGTATGTAC   |
| 806rcbc11   | FG             | AATTGTGTCGGA   |
| 806rcbc12   | FG             | TGCATACACTGG   |
| 806rcbc13   | FG             | AGTCGAACGAGG   |
| 806rcbc14   | FG             | ACCAGTGACTIONA |
| 806rcbc15   | FG             | GAATACCAAGTC   |
| 806rcbc16   | FG             | GTAGATCGTGTA   |
| 806rcbc17   | FG             | TAACGTGTGTGC   |
| 806rcbc18   | FG             | CATTATGGCGTG   |
| 806rcbc19   | FG             | CCAATACGCCTG   |
| 806rcbc20   | FG             | GATCTGCGATCC   |
| 806rcbc21   | FG             | CAGCTCATCAGC   |
| 806rcbc22   | FG             | CAAACAACAGCT   |
| 806rcbc23   | FG             | GCAACACCATCC   |

| Primer name | Library design | Sequence     |
|-------------|----------------|--------------|
| 806rcbc24   | FG             | GCGATATATCGC |
| 806rcbc25   | FG             | CGAGCAATCCTA |
| 806rcbc26   | FG             | AGTCGTGCACAT |
| 806rcbc27   | FG             | GTATCTGCGCGT |
| 806rcbc28   | FG             | CGAGGGAAAGTC |
| 806rcbc29   | FG             | CAAATTCGGGAT |
| 806rcbc30   | FG             | AGATTGACCAAC |
| 806rcbc31   | FG             | AGTTACGAGCTA |
| 806rcbc32   | FG             | GCATATGCACTG |
| 806rcbc33   | FG             | CAACTCCCGTGA |
| 806rcbc34   | FG             | TTGCGTTAGCAG |
| 806rcbc35   | FG             | TACGAGCCCTAA |
| 806rcbc36   | FG             | CACTACGCTAGA |
| 806rcbc37   | FG             | TGCAGTCCTCGA |
| 806rcbc38   | FG             | ACCATAGCTCCG |
| 806rcbc39   | FG             | TCGACATCTCTT |
| 806rcbc40   | FG             | GAACACTTTGGA |

## Overview Data Sets

Table S3: Overview of the experimental design for the data sets. Library preparation methods: nested single index (SI), NexteraXT (XT), nested dual index (DI), nested dual index with 5 random nucleotides before primer (5NDI), Fusion Golay (FG); Taq: HiFI Kapa (HF), Q5 neb (Q5); Template: *Anaerocellum thermophilum Z-1320 DSM 6725* (AT), *Bacteroides thetaiotaomicron VPI-5482* (BT), *Bacteroides vulgatus ATCC 8482* (BV), *Caldicellulosiruptor saccharolyticus DSM 8903* (CS), *Herpetosiphon aurantiacus ATCC 23779* (HA), *Rhodopirellula baltica SH 1* (RBS), *Leptothrix cholodnii SP-6* (LC), balanced mock community (MB) , unbalanced mock community (MUB); Primers: see Table S1+S2 for sequences

| Meta ID | Lib. Prep. | Run | Region | Machine | input ng | PCR cycle (R1+R2) | Taq | Template | F & R primer    |
|---------|------------|-----|--------|---------|----------|-------------------|-----|----------|-----------------|
| 19      | SI         | 1   | V4     | Miseq2  | 4        | 12+15             | Q5  | AT       | 515 & 805RA     |
| 20      | SI         | 1   | V4     | Miseq2  | 4        | 12+15             | Q5  | BT       | 515 & 805RA     |
| 21      | SI         | 1   | V4     | Miseq2  | 4        | 12+15             | Q5  | BV       | 515 & 805RA     |
| 22      | SI         | 1   | V4     | Miseq2  | 4        | 12+15             | Q5  | CS       | 515 & 805RA     |
| 23      | SI         | 1   | V4     | Miseq2  | 4        | 12+15             | HF  | AT       | 515 & 805RA     |
| 24      | SI         | 1   | V4     | Miseq2  | 4        | 12+15             | HF  | BT       | 515 & 805RA     |
| 25      | SI         | 1   | V4     | Miseq2  | 4        | 12+15             | HF  | BV       | 515 & 805RA     |
| 26      | SI         | 1   | V4     | Miseq2  | 4        | 12+15             | HF  | CS       | 515 & 805RA     |
| 27      | XT         | 2   | V3/V4  | Miseq1  | 2        | 15+12             | Q5  | AT       | 341f & 806rcb   |
| 28      | XT         | 2   | V3/V4  | Miseq1  | 2        | 15+12             | Q5  | BT       | 341f & 806rcb   |
| 29      | XT         | 2   | V3/V4  | Miseq1  | 2        | 15+12             | Q5  | BV       | 341f & 806rcb   |
| 30      | XT         | 2   | V3/V4  | Miseq1  | 2        | 15+12             | Q5  | CS       | 341f & 806rcb   |
| 31      | XT         | 2   | V3/V4  | Miseq1  | 2        | 12+12             | HF  | AT       | 341f & 806rcb   |
| 32      | XT         | 2   | V3/V4  | Miseq1  | 2        | 12+13             | HF  | BT       | 341f & 806rcb   |
| 33      | XT         | 2   | V3/V4  | Miseq1  | 2        | 12+14             | HF  | BV       | 341f & 806rcb   |
| 34      | XT         | 2   | V3/V4  | Miseq1  | 2        | 12+15             | HF  | CS       | 341f & 806rcb   |
| 35      | DI         | 2   | V4     | Miseq1  | 2        | 12+18             | HF  | MB       | 515 & 805RA     |
| 36      | 5NDI       | 2   | V4     | Miseq1  | 2        | 12+18             | HF  | MB       | 515 & 805RA     |
| 37      | DI         | 2   | V4     | Miseq1  | 2        | 12+18             | HF  | MB       | 515 & 806rcb    |
| 38      | 5NDI       | 2   | V4     | Miseq1  | 2        | 12+18             | HF  | MB       | 515 & 806rcbc27 |
| 39      | FG         | 3   | V4     | Miseq2  | 10       | 15                | HF  | MB       | 515 & 806rcbc27 |
| 40      | FG         | 3   | V4     | Miseq2  | 10       | 15                | HF  | MB       | 515 & 806rcbc28 |
| 41      | FG         | 3   | V4     | Miseq2  | 10       | 15                | HF  | MB       | 515 & 806rcbc29 |
| 42      | FG         | 3   | V4     | Miseq2  | 1        | 25                | HF  | MB       | 515 & 806rcbc30 |
| 43      | FG         | 3   | V4     | Miseq2  | 1        | 25                | HF  | MB       | 515 & 806rcbc31 |
| 44      | FG         | 3   | V4     | Miseq2  | 1        | 25                | HF  | MB       | 515 & 806rcbc32 |
| 45      | FG         | 3   | V4     | Miseq2  | 10       | 25                | HF  | MB       | 515 & 806rcbc33 |

Table S4: Overview of experimental design for data sets (2).

| Meta ID | Lib. Prep. | Run | Region | Machine | input ng | PCR cycle (R1+R2) | Taq | Template | F & R primer    |
|---------|------------|-----|--------|---------|----------|-------------------|-----|----------|-----------------|
| 46      | FG         | 3   | V4     | Miseq2  | 10       | 25                | HF  | MB       | 515 & 806rcbc34 |
| 47      | FG         | 3   | V4     | Miseq2  | 10       | 25                | HF  | MUB      | 515 & 806rcbc35 |
| 48      | DI         | 4   | V4     | Miseq2  | 2        | 12+20             | HF  | MUB      | F515A & 805RA   |
| 49      | DI         | 4   | V4     | Miseq2  | 2        | 12+20             | HF  | MUB      | F515A & 805RA   |
| 50      | XT         | 4   | 16S    | Miseq2  | 2        | 20                | HF  | MB       | 27YMF & 1492R   |
| 51      | XT         | 4   | 16S    | Miseq2  | 2        | 20                | HF  | MUB      | 27YMF & 1492R   |
| 52      | DI         | 5   | V4     | Miseq2  | 2        | 5+15              | HF  | MB       | F515A & 805RA   |
| 53      | DI         | 5   | V4     | Miseq2  | 2        | 8+15              | HF  | MB       | F515A & 805RA   |
| 54      | DI         | 5   | V4     | Miseq2  | 2        | 10+15             | HF  | MB       | F515A & 805RA   |
| 59      | DI         | 5   | V4     | Miseq2  | 2        | 8+15              | HF  | MB       | F515A & 805RA   |
| 60      | DI         | 5   | V4     | Miseq2  | 2        | 10+15             | HF  | MB       | F515A & 805RA   |
| 61      | DI         | 5   | V4     | Miseq2  | 2        | 10+15             | HF  | MB       | F515A & 805RA   |
| 62      | DI         | 5   | V4     | Miseq2  | 2        | 8+15              | HF  | MUB      | F515A & 805RA   |
| 64      | DI         | 5   | V4     | Miseq2  | 2        | 8+15              | HF  | MUB      | F515A & 805RA   |
| 65      | DI         | 5   | V4     | Miseq2  | 2        | 10+15             | HF  | MUB      | F515A & 805RA   |
| 66      | DI         | 5   | V4     | Miseq2  | 2        | 10+15             | HF  | MUB      | F515A & 805RA   |
| 67      | DI         | 5   | V4     | Miseq2  | 2        | 10+15             | HF  | MUB      | F515A & 805RA   |
| 68      | DI         | 5   | V4     | Miseq2  | 2        | 8+15              | HF  | HA       | F515A & 805RA   |
| 69      | DI         | 5   | V4     | Miseq2  | 2        | 8+15              | HF  | LC       | F515A & 805RA   |
| 71      | DI         | 5   | V4     | Miseq2  | 2        | 8+15              | HF  | RBS      | F515A & 805RA   |
| 74      | DI         | 5   | V4     | Miseq2  | 2        | 8+15              | Q5  | MB       | F515A & 805RA   |
| 75      | DI         | 5   | V4     | Miseq2  | 2        | 8+15              | Q5  | MB       | F515A & 805RA   |
| 76      | DI         | 5   | V4     | Miseq2  | 2        | 8+15              | Q5  | MB       | F515A & 805RA   |
| 77      | FG         | 6   | V4     | Miseq1  | 2        | 15                | HF  | MUB      | 515 & 806rcbc5  |
| 78      | FG         | 6   | V4     | Miseq1  | 5        | 15                | Q5  | MB       | 515 & 806rcbc8  |
| 79      | FG         | 6   | V4     | Miseq1  | 5        | 15                | Q5  | MB       | 515 & 806rcbc9  |
| 80      | FG         | 6   | V4     | Miseq1  | 5        | 25                | Q5  | MB       | 515 & 806rcbc0  |
| 81      | FG         | 6   | V4     | Miseq1  | 5        | 25                | Q5  | MB       | 515 & 806rcbc1  |
| 82      | FG         | 6   | V4     | Miseq1  | 5        | 15                | HF  | MB       | 515 & 806rcbc2  |
| 83      | FG         | 6   | V4     | Miseq1  | 5        | 15                | HF  | MB       | 515 & 806rcbc3  |
| 85      | FG         | 6   | V4     | Miseq1  | 5        | 25                | HF  | MB       | 515 & 806rcbc5  |
| 86      | DI         | 7   | V4     | Miseq2  | 2        | 10+15             | HF  | MB       | 515 & 806rcb    |
| 87      | DI         | 7   | V4     | Miseq2  | 2        | 10+15             | HF  | MB       | 515 & 806rcb    |
| 88      | DI         | 7   | V4     | Miseq2  | 2        | 10+15             | HF  | MB       | 515 & 806rcb    |
| 89      | DI         | 7   | V4     | Miseq2  | 2        | 10+15             | HF  | MUB      | 515 & 806rcb    |
| 90      | DI         | 7   | V4     | Miseq2  | 2        | 10+15             | HF  | MUB      | 515 & 806rcb    |
| 91      | DI         | 7   | V4     | Miseq2  | 2        | 10+15             | HF  | MUB      | 515 & 806rcb    |
| 93      | DI         | 7   | V4     | Miseq2  | 2        | 10+15             | HF  | AT       | 515 & 806rcb    |
| 94      | DI         | 7   | V4     | Miseq2  | 2        | 10+15             | HF  | BT       | 515 & 806rcb    |
| 96      | DI         | 7   | V4     | Miseq2  | 2        | 10+15             | HF  | CS       | 515 & 806rcb    |
| 97      | DI         | 7   | V3/V4  | Miseq2  | 2        | 10+15             | HF  | MB       | 341f & 806rcb   |
| 98      | DI         | 7   | V3/V4  | Miseq2  | 2        | 10+15             | HF  | MB       | 341f & 806rcb   |
| 99      | DI         | 7   | V3/V4  | Miseq2  | 2        | 10+15             | HF  | MB       | 341f & 806rcb   |
| 100     | DI         | 7   | V3/V4  | Miseq2  | 2        | 10+15             | HF  | MB       | 341f & 805RA    |
| 101     | DI         | 7   | V3/V4  | Miseq2  | 2        | 10+15             | HF  | MB       | 341f & 805RA    |
| 102     | DI         | 7   | V3/V4  | Miseq2  | 2        | 10+15             | HF  | MB       | 341f & 805RA    |

## Availability of data sets:

Table S5: Overview of accession numbers and corresponding Meta ID for all data sets.

| Sample accession | Secondary accession | Meta ID | Sample accession | Secondary accession | Meta ID |
|------------------|---------------------|---------|------------------|---------------------|---------|
| ERS447105        | SAMEA2494039        | 19      | ERS447148        | SAMEA2494082        | 62      |
| ERS447106        | SAMEA2494040        | 20      | ERS447149        | SAMEA2494083        | 63      |
| ERS447107        | SAMEA2494041        | 21      | ERS447150        | SAMEA2494084        | 64      |
| ERS447108        | SAMEA2494042        | 22      | ERS447151        | SAMEA2494085        | 65      |
| ERS447109        | SAMEA2494043        | 23      | ERS447152        | SAMEA2494086        | 66      |
| ERS447110        | SAMEA2494044        | 24      | ERS447153        | SAMEA2494087        | 67      |
| ERS447111        | SAMEA2494045        | 25      | ERS447154        | SAMEA2494088        | 68      |
| ERS447112        | SAMEA2494046        | 26      | ERS447155        | SAMEA2494089        | 69      |
| ERS447113        | SAMEA2494047        | 27      | ERS447156        | SAMEA2494090        | 70      |
| ERS447114        | SAMEA2494048        | 28      | ERS447157        | SAMEA2494091        | 71      |
| ERS447115        | SAMEA2494049        | 29      | ERS447158        | SAMEA2494092        | 72      |
| ERS447116        | SAMEA2494050        | 30      | ERS447159        | SAMEA2494093        | 73      |
| ERS447117        | SAMEA2494051        | 31      | ERS447160        | SAMEA2494094        | 74      |
| ERS447118        | SAMEA2494052        | 32      | ERS447161        | SAMEA2494095        | 75      |
| ERS447119        | SAMEA2494053        | 33      | ERS447162        | SAMEA2494096        | 76      |
| ERS447120        | SAMEA2494054        | 34      | ERS447163        | SAMEA2494097        | 77      |
| ERS447121        | SAMEA2494055        | 35      | ERS447164        | SAMEA2494098        | 78      |
| ERS447122        | SAMEA2494056        | 36      | ERS447165        | SAMEA2494099        | 79      |
| ERS447123        | SAMEA2494057        | 37      | ERS447166        | SAMEA2494100        | 80      |
| ERS447124        | SAMEA2494058        | 38      | ERS447167        | SAMEA2494101        | 81      |
| ERS447125        | SAMEA2494059        | 39      | ERS447168        | SAMEA2494102        | 82      |
| ERS447126        | SAMEA2494060        | 40      | ERS447169        | SAMEA2494103        | 83      |
| ERS447127        | SAMEA2494061        | 41      | ERS447170        | SAMEA2494104        | 84      |
| ERS447128        | SAMEA2494062        | 42      | ERS447171        | SAMEA2494105        | 85      |
| ERS447129        | SAMEA2494063        | 43      | ERS447172        | SAMEA2494106        | 86      |
| ERS447130        | SAMEA2494064        | 44      | ERS447173        | SAMEA2494107        | 87      |
| ERS447131        | SAMEA2494065        | 45      | ERS447174        | SAMEA2494108        | 88      |
| ERS447132        | SAMEA2494066        | 46      | ERS447175        | SAMEA2494109        | 89      |
| ERS447133        | SAMEA2494067        | 47      | ERS447176        | SAMEA2494110        | 90      |
| ERS447134        | SAMEA2494068        | 48      | ERS447177        | SAMEA2494111        | 91      |
| ERS447135        | SAMEA2494069        | 49      | ERS447178        | SAMEA2494112        | 92      |
| ERS447136        | SAMEA2494070        | 50      | ERS447179        | SAMEA2494113        | 93      |
| ERS447137        | SAMEA2494071        | 51      | ERS447180        | SAMEA2494114        | 94      |
| ERS447138        | SAMEA2494072        | 52      | ERS447181        | SAMEA2494115        | 95      |
| ERS447139        | SAMEA2494073        | 53      | ERS447182        | SAMEA2494116        | 96      |
| ERS447140        | SAMEA2494074        | 54      | ERS447183        | SAMEA2494117        | 97      |
| ERS447141        | SAMEA2494075        | 55      | ERS447184        | SAMEA2494118        | 98      |
| ERS447142        | SAMEA2494076        | 56      | ERS447185        | SAMEA2494119        | 99      |
| ERS447143        | SAMEA2494077        | 57      | ERS447186        | SAMEA2494120        | 100     |
| ERS447144        | SAMEA2494078        | 58      | ERS447187        | SAMEA2494121        | 101     |
| ERS447145        | SAMEA2494079        | 59      | ERS447188        | SAMEA2494122        | 102     |
| ERS447146        | SAMEA2494080        | 60      |                  |                     |         |
| ERS447147        | SAMEA2494081        | 61      |                  |                     |         |



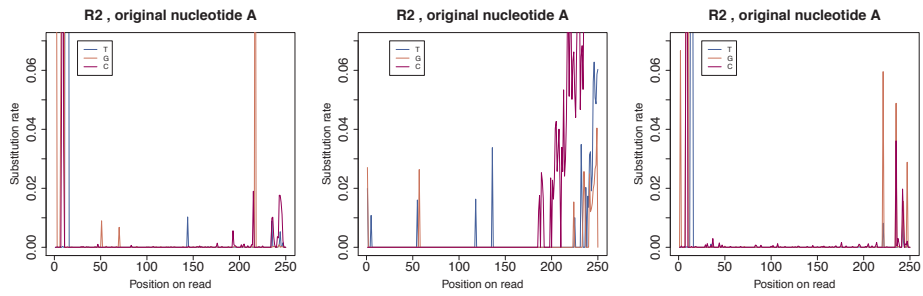

(a) Sub. profiles for R2 (orig. nucleotide A): *Bacteroides thetaiotaomicron* VPI-5482

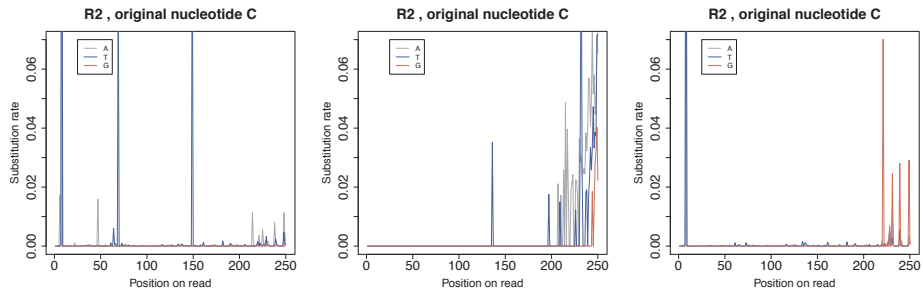

(b) Sub. profiles for R2 (orig. nucleotide C): *Bacteroides thetaiotaomicron* VPI-5482

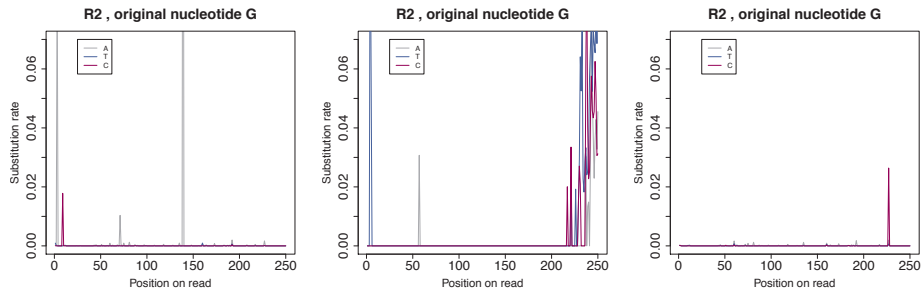

(c) Sub. profiles for R2 (orig. nucleotide G): *Bacteroides thetaiotaomicron* VPI-5482

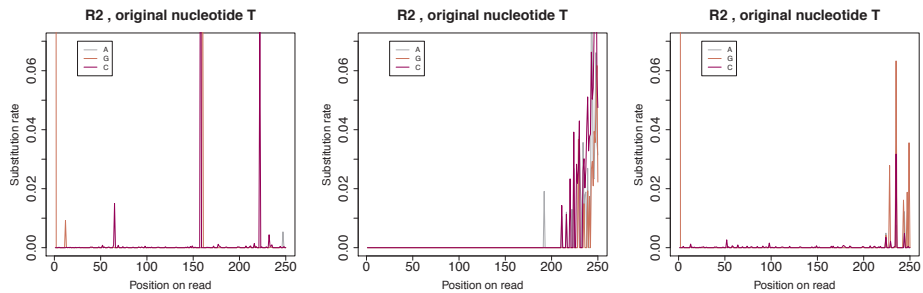

(d) Sub. profiles for R2 (orig. nucleotide T): *Bacteroides thetaiotaomicron* VPI-5482

Figure S2: The figure displays the error profiles for three data sets where the organism *Bacteroides thetaiotaomicron* VPI-5482 was sequenced. Each library was constructed with a different method. For the data set displayed in the first column the nested single index was used, for the data set displayed in the second column NexteraXT was used and the last library was constructed with the nested dual index.

Table S6: Overview of organisms in the mock community.

| <b><u>Bacteria</u></b>                                      |                                                       |
|-------------------------------------------------------------|-------------------------------------------------------|
| <i>Acidobacterium capsulatum</i> ATCC 51196                 | <i>Ruegeria pomeroyi</i> DSS-3                        |
| <i>Akkermansia muciniphila</i> ATCC BAA-835                 | <i>Salinispora arenicola</i> CNS-205                  |
| <i>Anaerocellum thermophilum</i> Z-1320, DSM 6725           | <i>Salinispora tropica</i> CNB-440                    |
| <i>Bacteroides thetaiotaomicron</i> VPI-5482                | <i>Shewanella baltica</i> OS185                       |
| <i>Bacteroides vulgatus</i> ATCC 8482                       | <i>Shewanella baltica</i> OS223                       |
| <i>Bordetella bronchiseptica</i> RB50                       | <i>Sulfitobacter</i> sp. EE-36                        |
| <i>Burkholderia xenovorans</i> LB400                        | <i>Sulfitobacter</i> sp. NAS-14.1                     |
| <i>Caldicellulosiruptor saccharolyticus</i> DSM 8903        | <i>Sulfurihydrogenibium</i> sp. YO3AOP1               |
| <i>Chlorobaculum tepidum</i> TLS                            | <i>Sulfurihydrogenibium yellowstonense</i> SS-5       |
| <i>Chlorobium limicola</i> DSM 245                          | <i>Thermoanaerobacter pseudethanolicus</i> ATCC 33223 |
| <i>Chlorobium phaeobacteroides</i> DSM 266                  | <i>Thermotoga neapolitana</i> DSM 4359                |
| <i>Chlorobium phaeovibrioides</i> DSM 265                   | <i>Thermotoga petrophila</i> RKU-1                    |
| <i>Chloroflexus aurantiacus</i> J-10-fl                     | <i>Thermotoga</i> sp. RQ2                             |
| <i>Clostridium thermocellum</i> ATCC 27405                  | <i>Thermus thermophilus</i> HB8                       |
| <i>Deinococcus radiodurans</i> R1                           | <i>Treponema denticola</i> ATCC 35405                 |
| <i>Desulfovibrio desulfuricans desulfuricans</i> ATCC 27774 | <i>Treponema vincentii</i> I                          |
| <i>Desulfovibrio piger</i> ATCC 29098                       | <i>Zymomonas mobilis mobilis</i> ZM4                  |
| <i>Dictyoglomus turgidum</i> DSM 6724                       |                                                       |
| <i>Erwinia chrysanthemi</i>                                 |                                                       |
| <i>Enterococcus faecalis</i> V583v                          |                                                       |
| <i>Fusobacterium nucleatum nucleatum</i> ATCC 25586         |                                                       |
| <i>Gemmatimonas aurantiaca</i> T-27T                        |                                                       |
| <i>Herpetosiphon aurantiacus</i> ATCC 23779                 |                                                       |
| <i>Hydrogenobaculum</i> sp. Y04AAS1                         |                                                       |
| <i>Leptothrix cholodnii</i> SP-6                            |                                                       |
| <i>Nitrosomonas europaea</i> ATCC 19718                     |                                                       |
| <i>Nostoc</i> sp. PCC 7120                                  |                                                       |
| <i>Pelodictyon phaeoclathratiforme</i> BU-1                 |                                                       |
| <i>Persephonella marina</i> EX-H1                           |                                                       |
| <i>Porphyromonas gingivalis</i> ATCC 33277                  |                                                       |
| <i>Rhodopirellula baltica</i> SH 1                          |                                                       |
| <i>Rhodospirillum rubrum</i> ATCC 11170                     |                                                       |
|                                                             | <b><u>Archaea</u></b>                                 |
|                                                             | <i>Archaeoglobus fulgidus</i> DSM 4304                |
|                                                             | <i>Ignicoccus hospitalis</i> KIN4/I                   |
|                                                             | <i>Methanocaldococcus jannaschii</i> DSM 2661         |
|                                                             | <i>Methanococcus maripaludis</i> C5                   |
|                                                             | <i>Methanococcus maripaludis</i> S2                   |
|                                                             | <i>Nanoarchaeum equitans</i> Kin4-M                   |
|                                                             | <i>Pyrobaculum aerophilum</i> IM2                     |
|                                                             | <i>Pyrobaculum calidifontis</i> JCM 11548             |
|                                                             | <i>Pyrococcus horikoshii</i> OT3                      |
|                                                             | <i>Sulfolobus tokodaii</i> 7(S311)                    |

## Permutation ANOVA for Error Profiles

We used the Hellinger distance to create distance matrices followed by a permutation ANOVA to determine how much of the variation can be explained by the environmental factors and to identify the factors driving the clustering that we observed in Figure 5.

Environmental factors: library preparation method, run, region, machine, input ng, PCR Cycle (R1+R2), taq, template, forward+reverse primer

### R1 + R2 Substitutions

We used stepwise regression (R function: step()) with Redundancy Analysis (RDA) (R function: rda()) to determine which factors to include and their order based on the R1 data and used the same model for R2. The resulting model (library preparation method + run + input ng + PCR cycle R1&R2 + taq + template + forward & reverse primer) was used for the adonis() function of the vegan package.

Table S7: Results for R1 substitutions.

|                            | Df | SumsOfSqs | MeanSqs | F.Model | R2      | Pr(>F)    |
|----------------------------|----|-----------|---------|---------|---------|-----------|
| Library Preparation Method | 3  | 632.26    | 210.753 | 24.1463 | 0.36841 | 0.001 *** |
| Run                        | 1  | 110.02    | 110.018 | 12.6049 | 0.06411 | 0.001 *** |
| input ng                   | 1  | 19.29     | 19.286  | 2.2096  | 0.01124 | 0.040 *   |
| PCR Cycle R1+R2            | 9  | 234.16    | 26.018  | 2.9809  | 0.13644 | 0.001 *** |
| Taq                        | 1  | 31.02     | 31.025  | 3.5546  | 0.01808 | 0.004 **  |
| Template                   | 8  | 122.45    | 15.307  | 1.7537  | 0.07135 | 0.002 **  |
| F R Primer                 | 13 | 340.06    | 26.158  | 2.9970  | 0.19815 | 0.001 *** |
| Residuals                  | 26 | 226.93    | 8.728   |         | 0.13223 |           |
| Total                      | 62 | 1716.19   |         |         | 1.00000 |           |

Table S8: Results for R2 substitutions.

|                            | Df | SumsOfSqs | MeanSqs | F.Model | R2      | Pr(>F)    |
|----------------------------|----|-----------|---------|---------|---------|-----------|
| Library Preparation Method | 4  | 1017.07   | 254.267 | 20.5682 | 0.44486 | 0.001 *** |
| Run                        | 1  | 112.37    | 112.374 | 9.0902  | 0.04915 | 0.001 *** |
| input ng                   | 1  | 60.47     | 60.469  | 4.8915  | 0.02645 | 0.001 *** |
| PCR Cycle R1 + R2          | 10 | 310.93    | 31.093  | 2.5151  | 0.13600 | 0.001 *** |
| Taq                        | 1  | 18.37     | 18.374  | 1.4863  | 0.00804 | 0.129     |
| Template                   | 8  | 180.77    | 22.597  | 1.8279  | 0.07907 | 0.001 *** |
| F R PRIMER                 | 5  | 165.95    | 33.190  | 2.6848  | 0.07259 | 0.001 *** |
| Residuals                  | 34 | 420.31    | 12.362  |         | 0.18384 |           |
| Total                      | 64 | 2286.24   |         |         | 1.00000 |           |

# Multidimensional scaling (MDS) plots for quality profiles of insertions and deletions

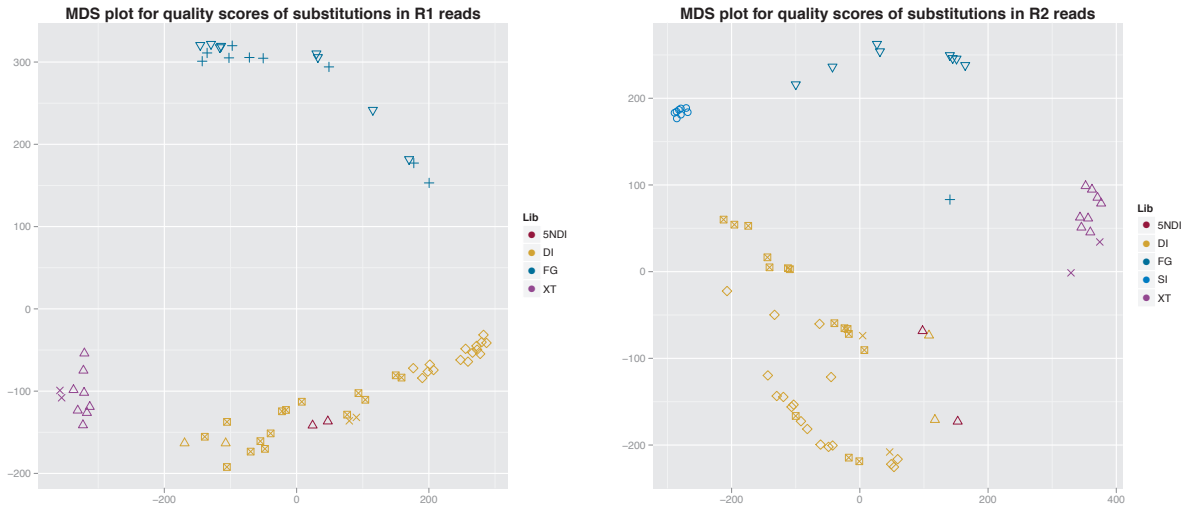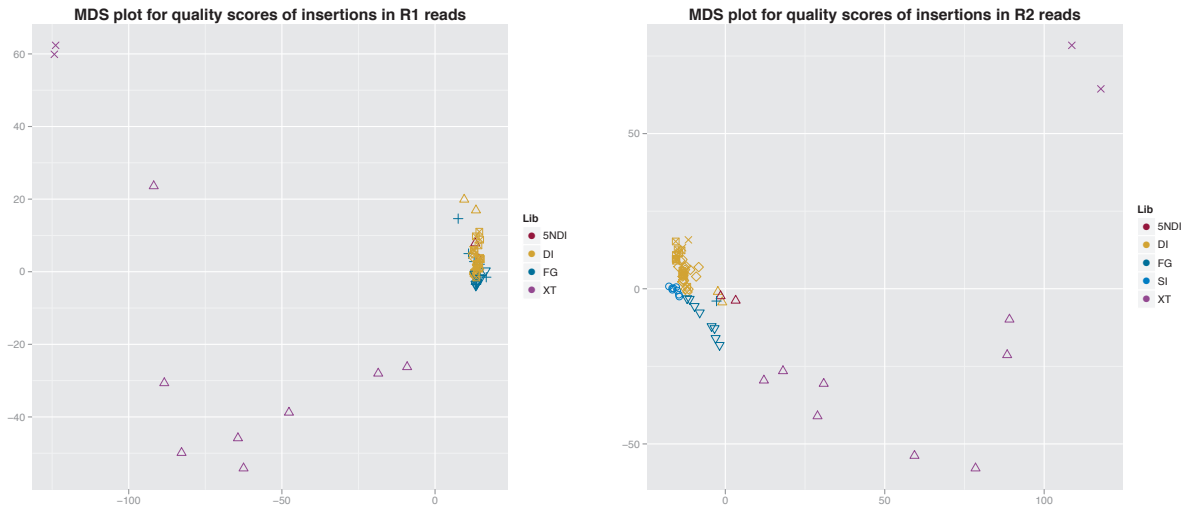

(b) Insertions

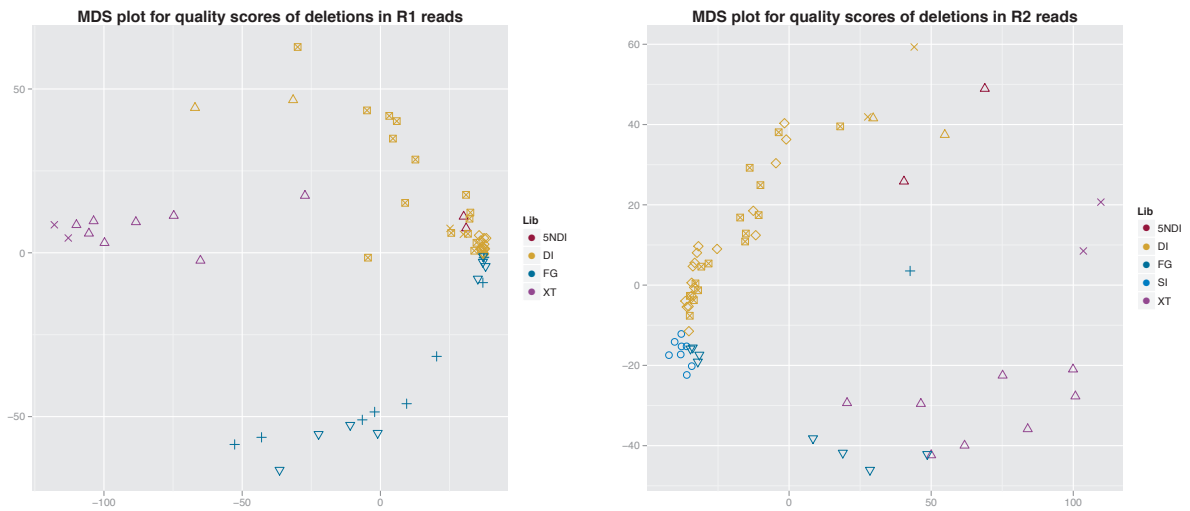

(c) Deletions

Figure S3: We used Hellinger distance to construct a similarity matrix for the position specific quality distributions. The different library preparations methods of the data sets are indicated by colour and the run information is identified by shape.

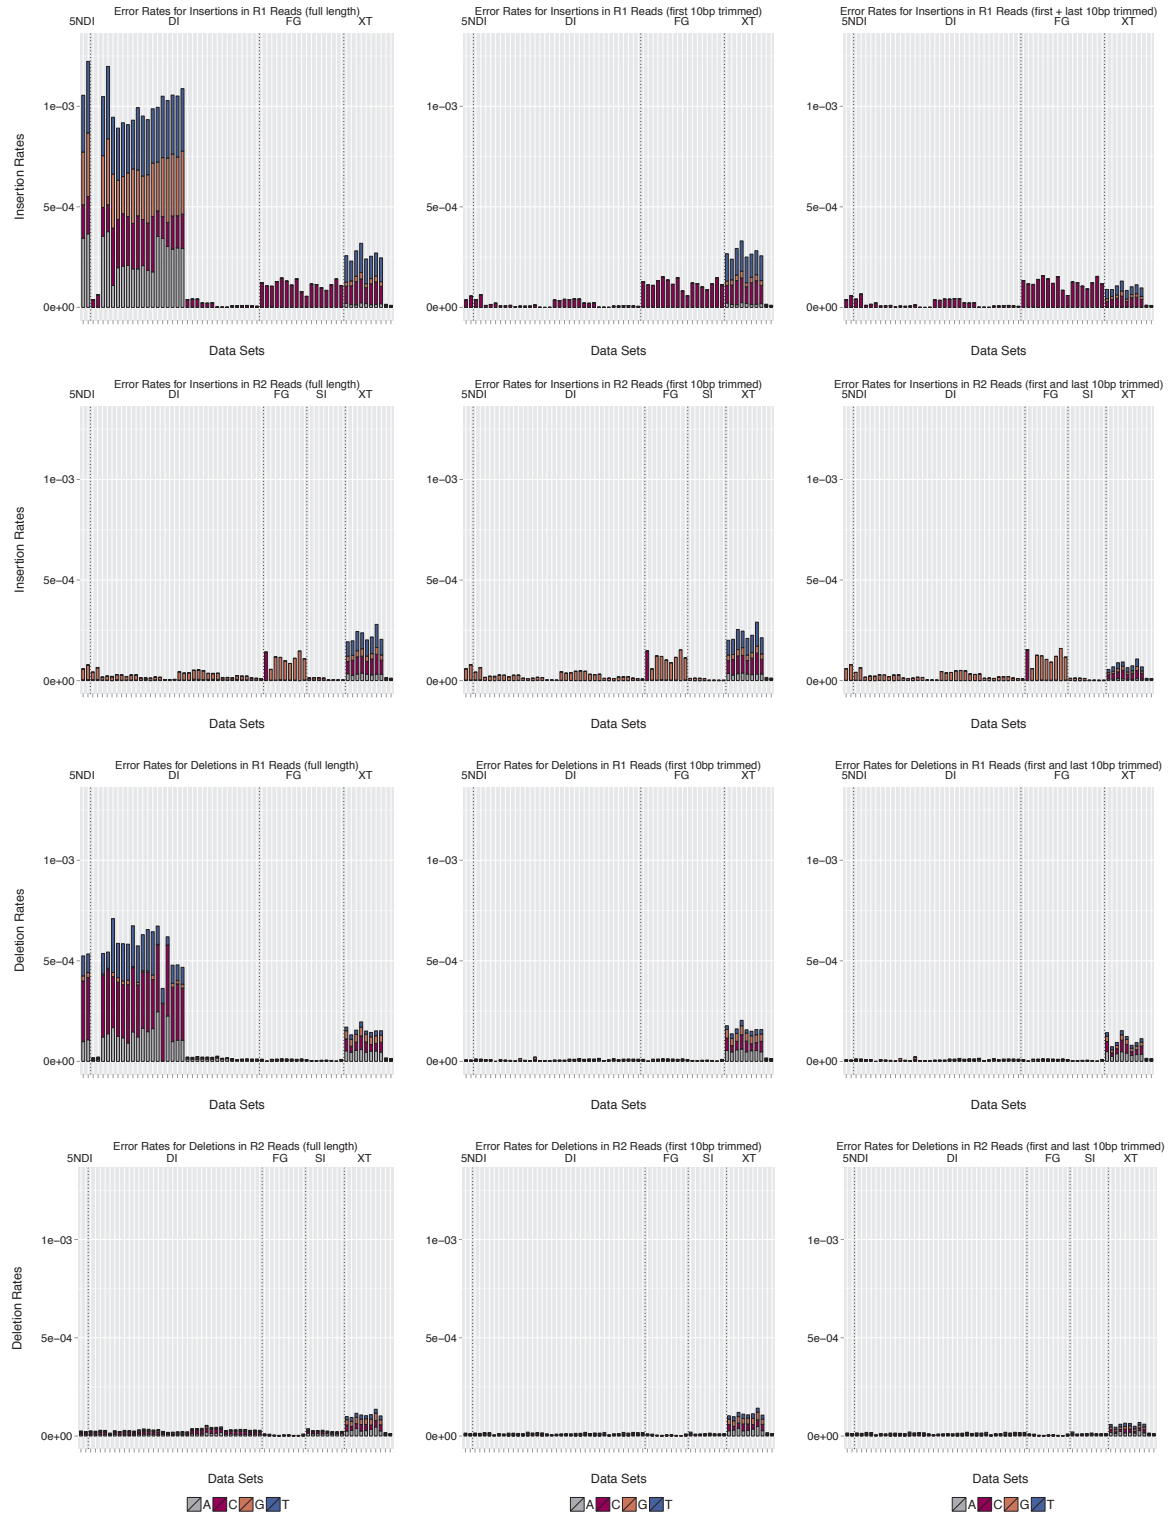

Figure S4: Trimming the start and end of the read to remove indels: The first column shows the R1 and R2 indel rates for the raw reads (full length). The second column shows the error rates after trimming the first 10bp and the last column shows the error rates after additionally trimming the last 10bp. Data sets indicated on the x axis grouped by library preparation method (from left to right): 36, 38, 35, 37, 48, 49, 54, 59, 60, 61, 62, 64, 65, 66, 67, 68, 69, 71, 74, 75, 76, 86, 87, 88, 89, 90, 91, 93, 94, 96, 97, 98, 99, 100, 101, 102, 39, 40, 41, 42, 43, 44, 45, 46, 47, 77, 78, 79, 80, 81, 82, 83, 85, 27, 28, 29, 30, 31, 32, 33, 34, 50, 51

### Overview Substituting Nucleotides in R1 Reads

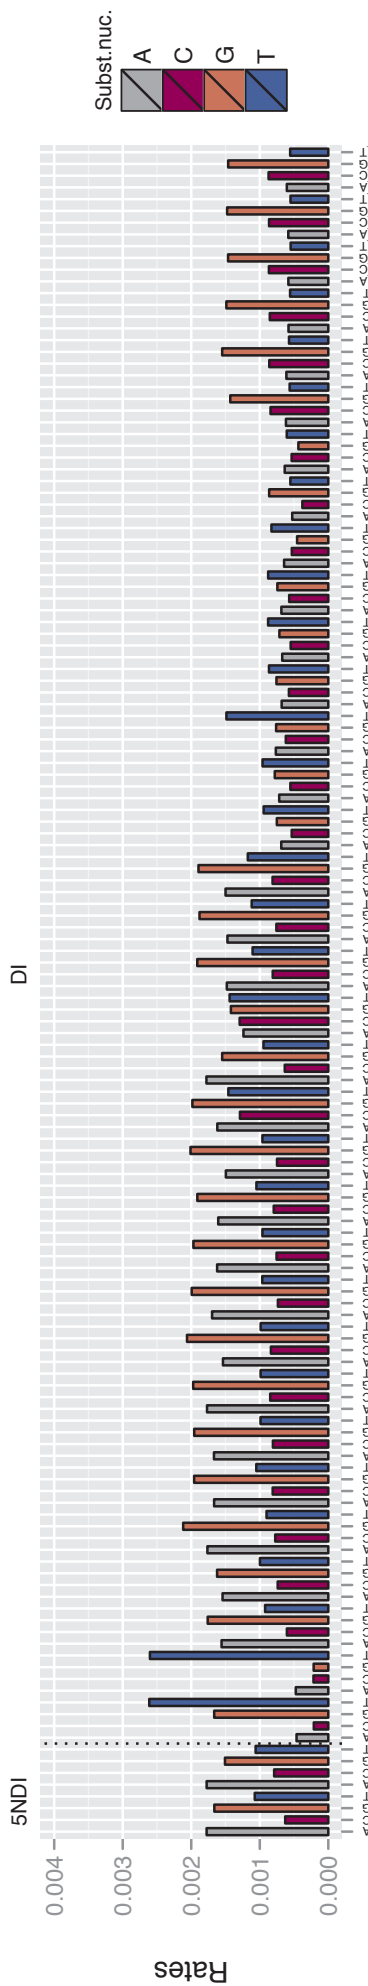

### Data Sets

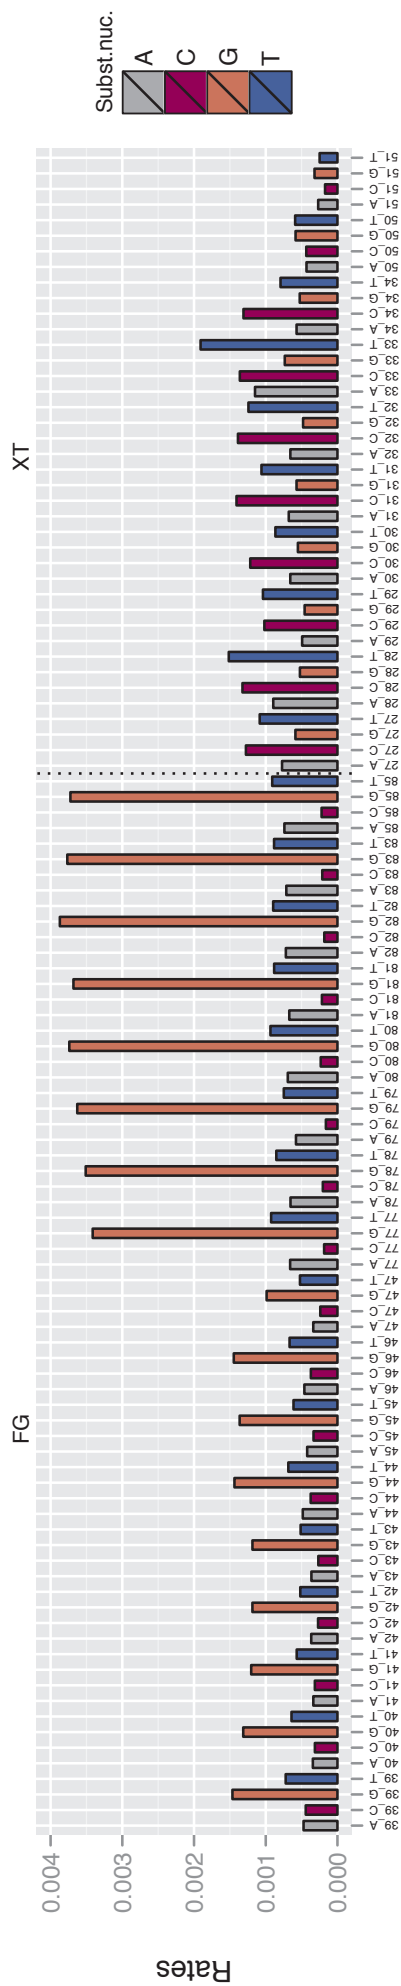

### Data Sets

Figure S5: The figure indicates the rate of each substituting nucleotide in R1 reads for the 5N dual index and dual index data sets (upper plot) and the Fusion Golay and NexteraXT data sets (lower plot).

### Overview Substituting Nucleotides in R2 Reads

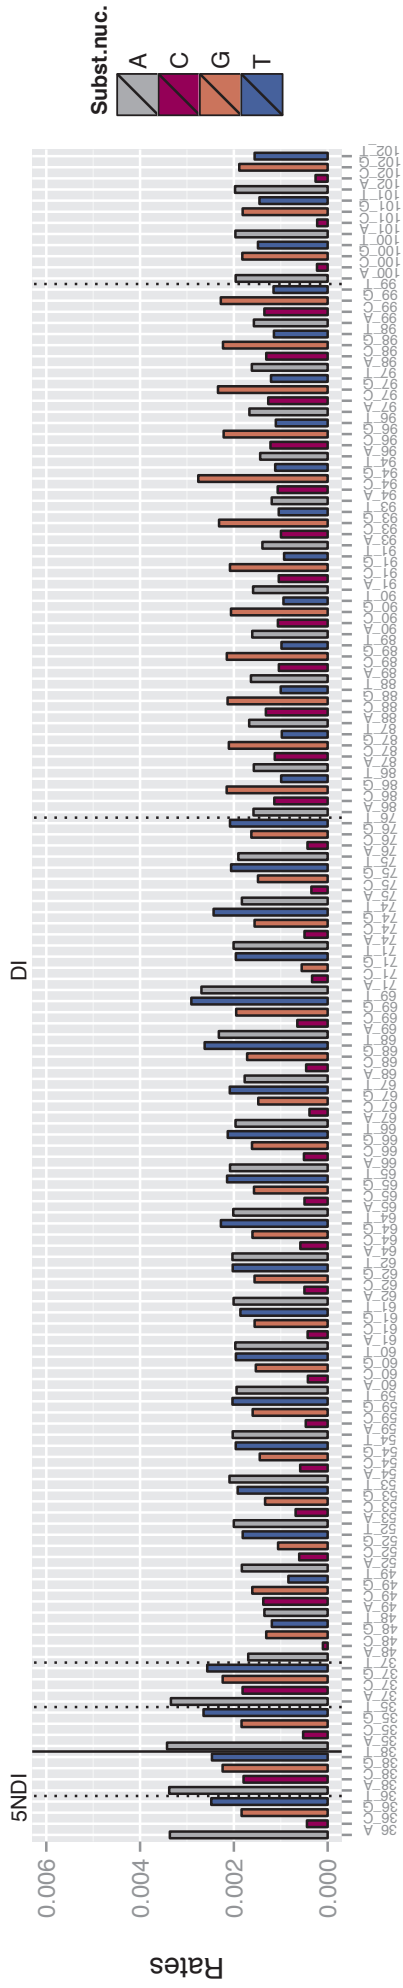

### Data Sets

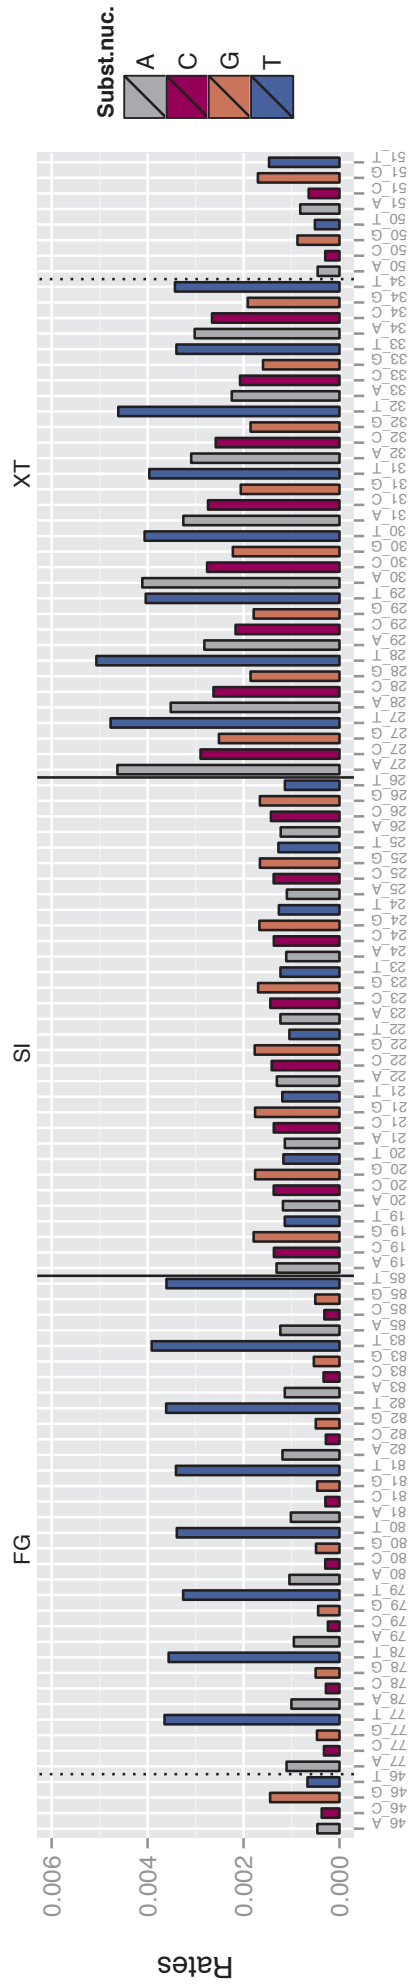

### Data Sets

Figure S6: The figure indicates the rate of each substituting nucleotide in R2 reads for the 5N dual index and dual index data sets (upper plot) and the Fusion Golay, single index and NexteraXT data sets (lower plot).

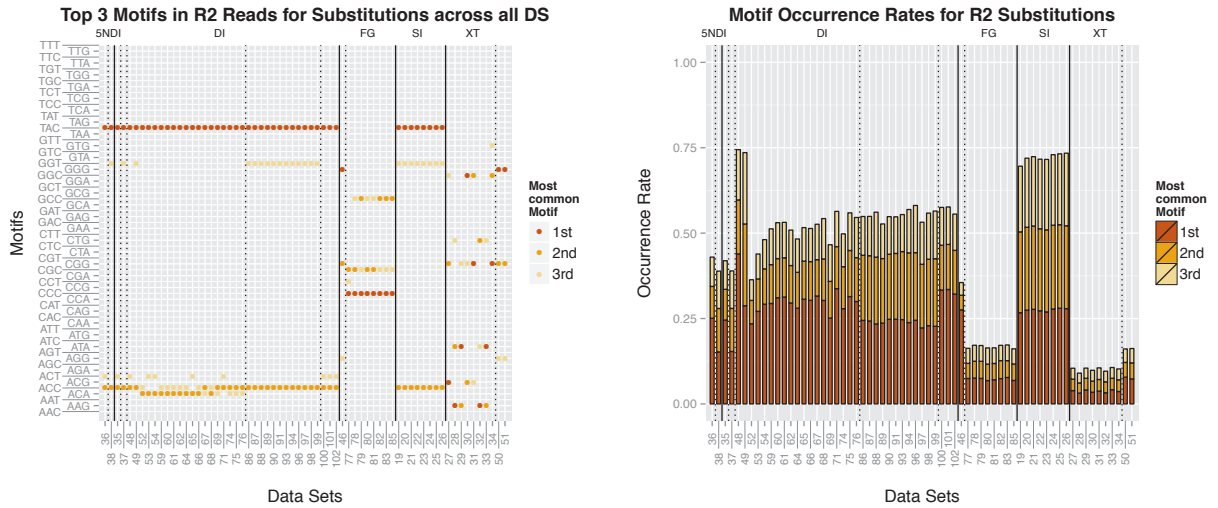

(a) R2 substitutions

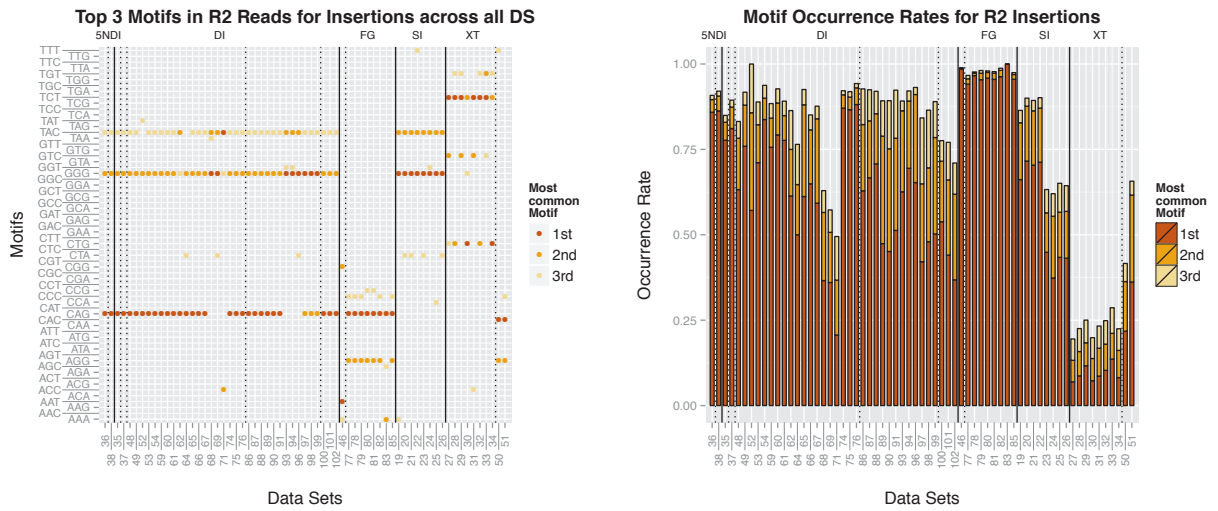

(b) R2 insertions

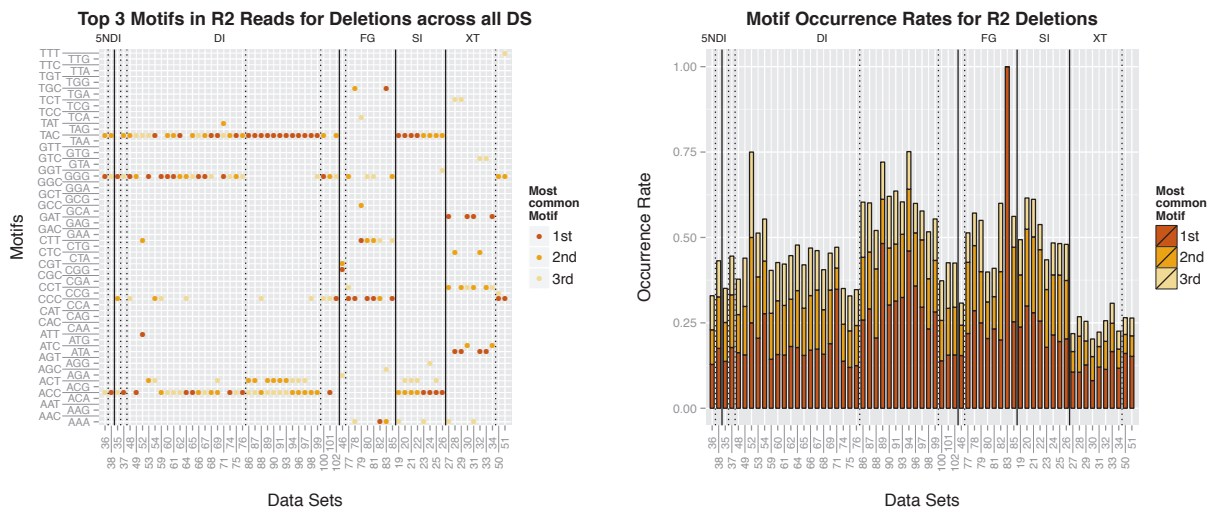

(c) R2 deletions

Figure S7: We recorded all 3mers preceding a substitution, insertion or deletion error in R2 reads, respectively. The first column displays the 3 most common motifs for each data set and the second column illustrates the percentage of errors that were associated with the respective motif. Data sets are grouped by library preparation (solid lines) and primers (dotted lines).



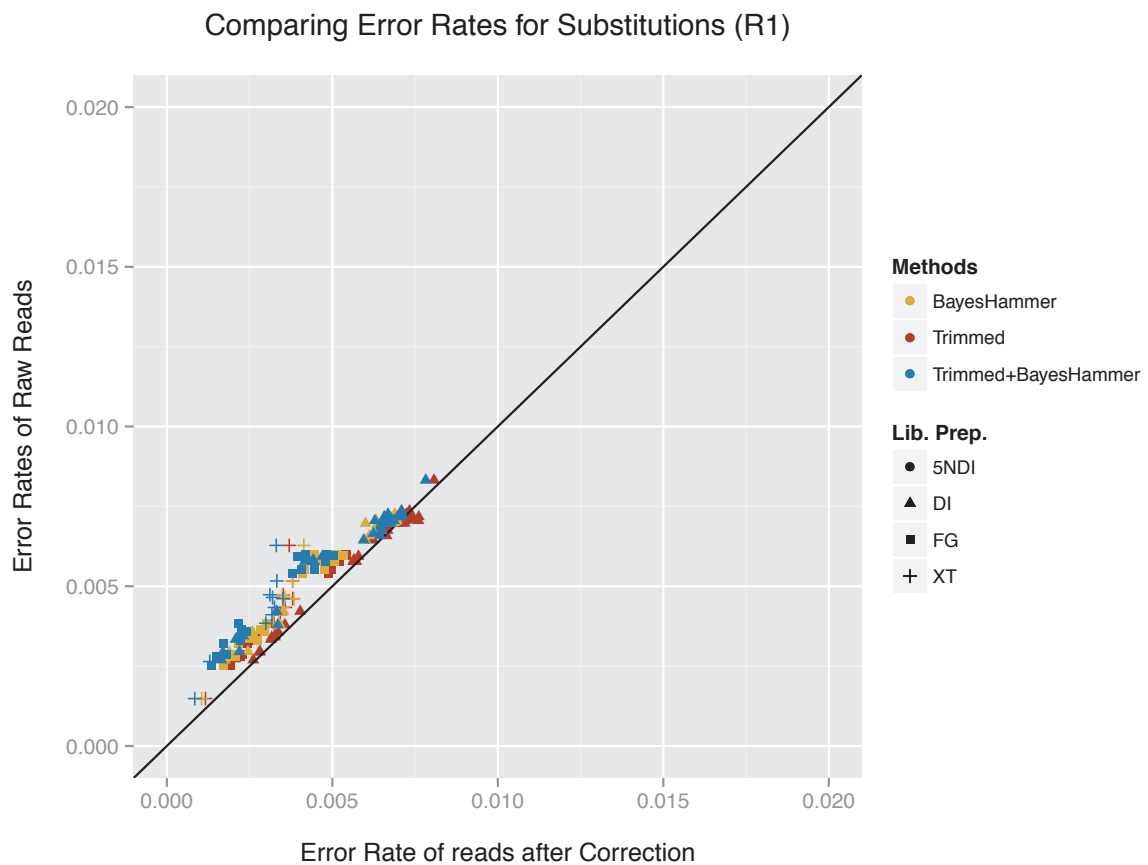

Figure S8: The figure displays the R1 results for different error correction approaches (keeping R1 and R2 reads separate). First trimming the reads and then applying BayesHammer yields slightly better results than each method on its own. We included only the data sets in the figure for which we had at least 1,000 aligned reads for all methods. Excluded data sets: 19-26 (no results on raw reads), 52 (no results across all methods), 53 (no results on raw reads).

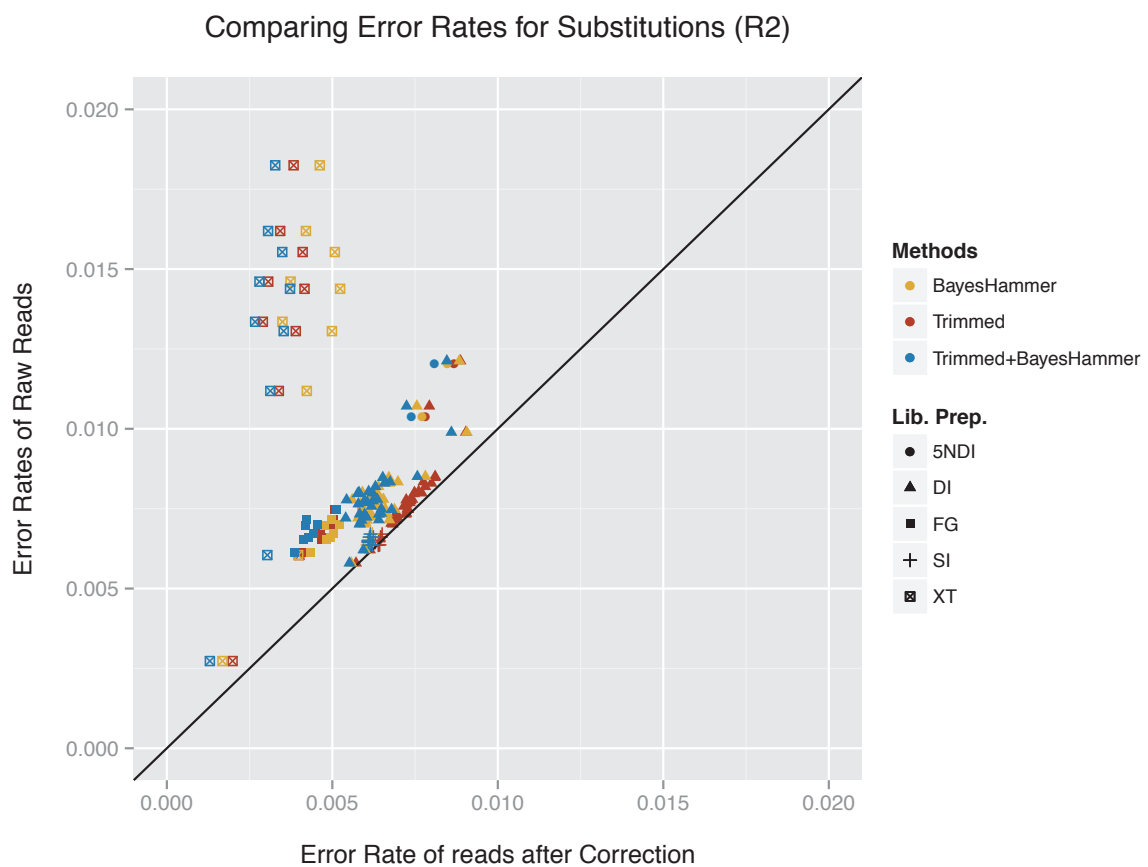

Figure S9: The figure displays the R2 results analogously (see figure S8). Excluded data sets: 39-41+43 (no results across all methods), 42+44+45+47 (no results for raw reads, BayesHammer, trimming+BayesHammer), 46+52 (no results for trimming+BayesHammer).

### Comparing Error Rates for Substitutions for Pear (R1+R2)

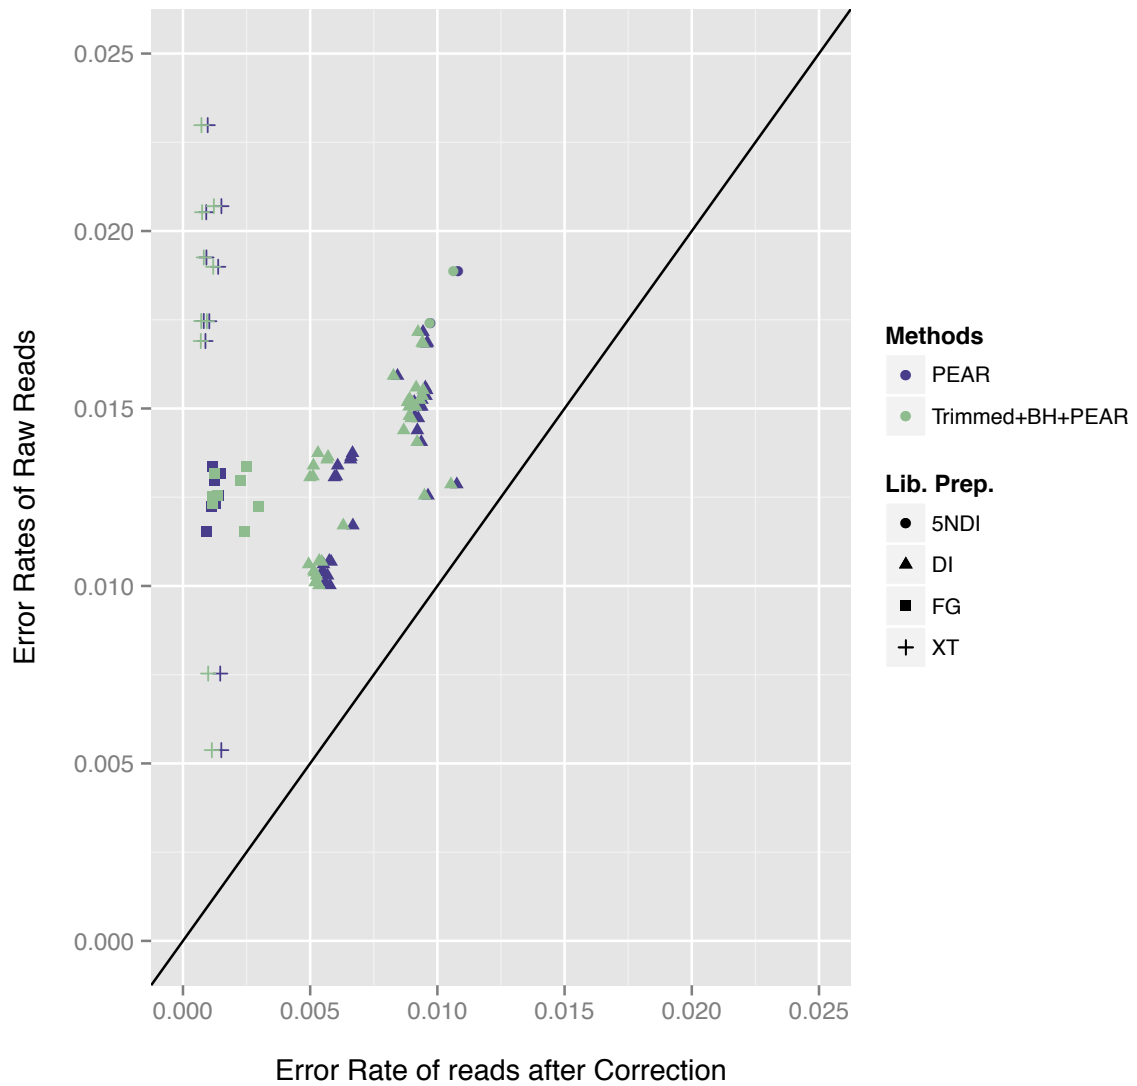

Figure S10: The figure summarises the results for directly applying PEAR to the raw reads and after processing the reads with Sickle and BayesHammer. Excluded data sets: 19-26, 39-45, 47 (not enough aligned raw reads), 46 (no results for PEAR), 52 (no results across all methods), 53 (no results for raw reads and PEAR).

### Comparing Error Rates for Substitutions for PandaSeq (R1+R2)

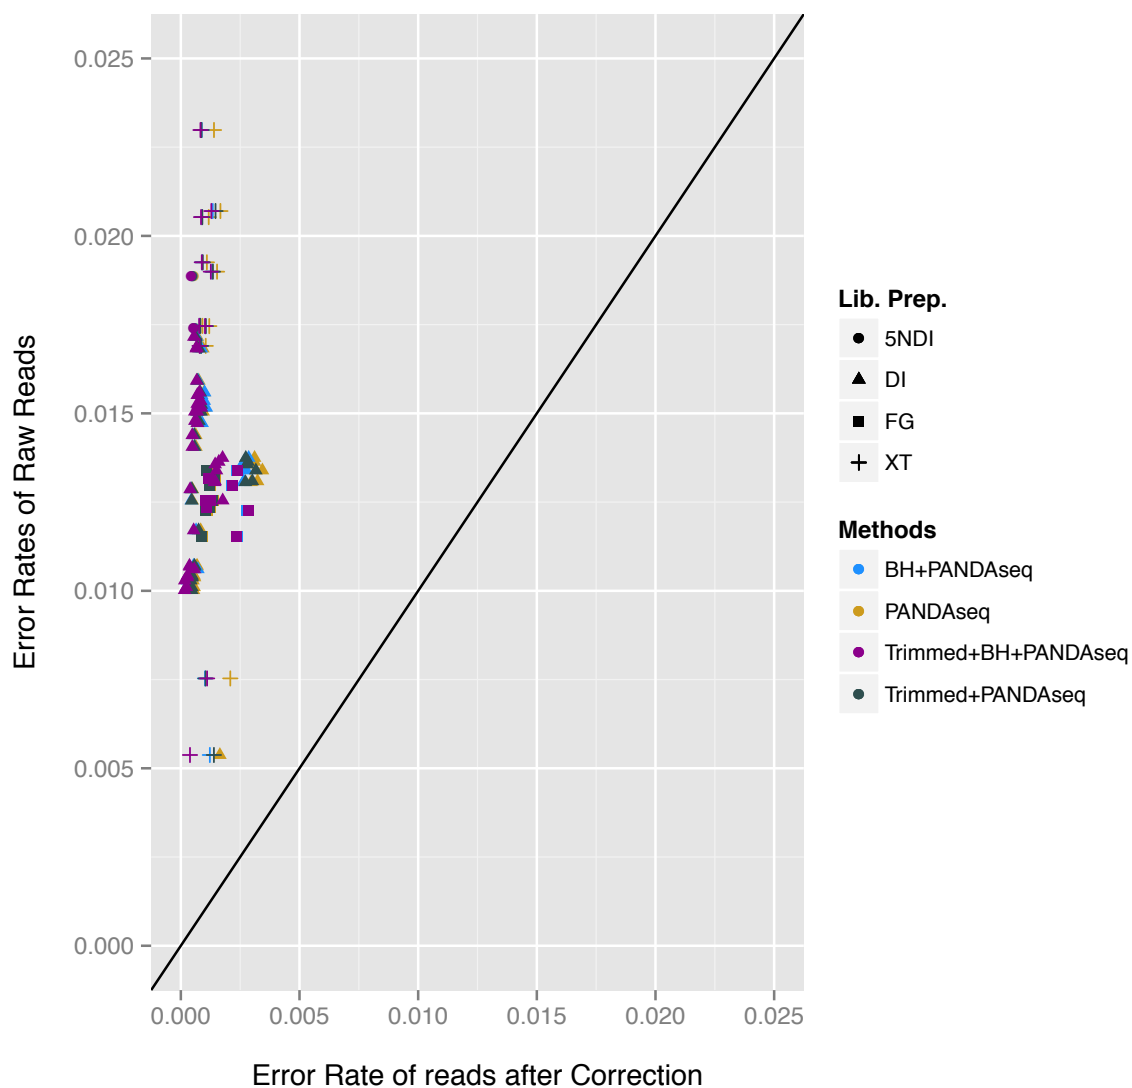

Figure S11: The figure summarises the results for PANDAseq combined with trimming and BayesHammer. (The 50bp overlap was reduced to 10bp for the V3/V4 data sets for Trimmed+BH+PANDAseq.) Excluded data sets: For raw reads: 19-26, 39-45, 47,52, 53; for PANDAseq: 20, 24, 25, 46; for BH+PANDAseq: 46; for trimming+PANDAseq: none; for trimming+BH+PANDAseq: none
